# Supplementary material
Source: Royal Society of Chemistry journal article supplement (doi:10.1039/d6nr00640j)
Supplement: d6nr00640j1.pdf [file d6nr00640j1.pdf]

## Supporting Information

### From Photocorrosion to Photoactivity: Sulfite-Gated Self-Etching of BiVO<sub>4</sub> into Black Bi-O phase

Received 00th January 20xx,  
Accepted 00th January 20xx

Hangyu Hu,<sup>ab</sup> Yang Han,<sup>ab</sup> Zhemeng Bao,<sup>ab</sup> Weijie Zhuang,<sup>ab</sup> Yaohua Jia,<sup>ab</sup> Kai Yang,<sup>ab</sup> Miao Kan,<sup>\*ab</sup> Jinlong Zhang<sup>\*ab</sup>

DOI: 10.1039/x0xx00000x

#### Contents

Figure S1 to S7

Table S1 to S3

<sup>a</sup> State Key Laboratory of Green Chemical Engineering and Industrial Catalysis, School of Chemistry and Molecular Engineering, East China University of Science and Technology, 130 Meilong Road, Shanghai 200237, P. R. China.  
Corresponding to [miao\\_kan@ecust.edu.cn](mailto:miao_kan@ecust.edu.cn); [jlzhang@ecust.edu.cn](mailto:jlzhang@ecust.edu.cn).

<sup>b</sup> Shanghai Engineering Research Center for Multimedia Environmental Catalysis and Resource Utilization, East China University of Science and Technology, 130 Meilong Road, Shanghai 200237, P. R. China.

Supplementary Information available. See DOI: 10.1039/x0xx00000x.

## Supporting Figures

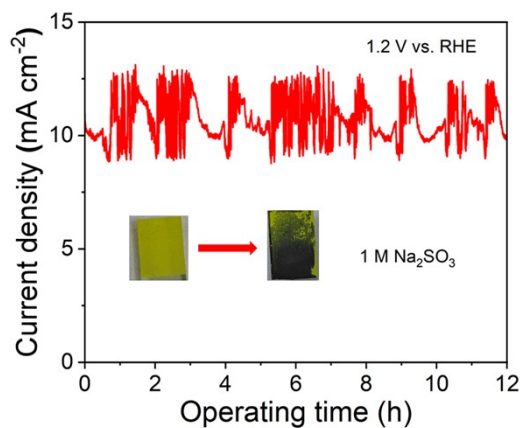

**Figure S1.** Chronoamperometric behavior of BiVO<sub>4</sub> at 1.2 V vs. RHE under otherwise identical conditions, showing visible blackening after treatment.

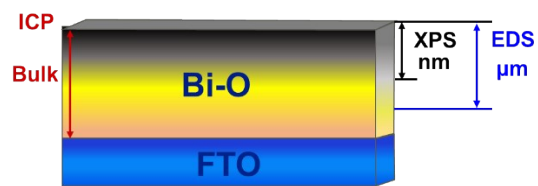

**Figure S2.** The EDS, XPS and ICP analysis of Bi-O on FTO.

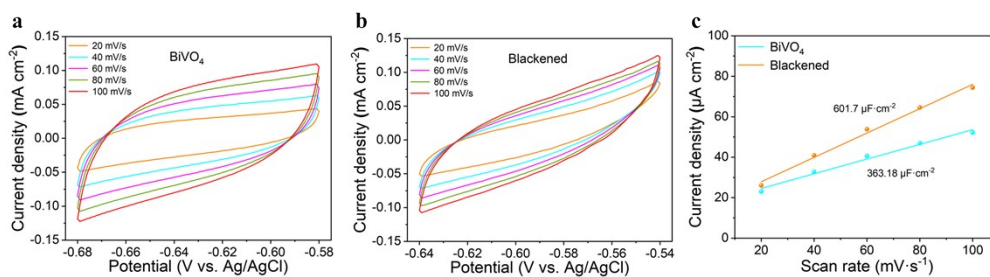

**Figure S3.** The calculated  $C_{dl}$  value of  $\text{BiVO}_4$  and Blackened.

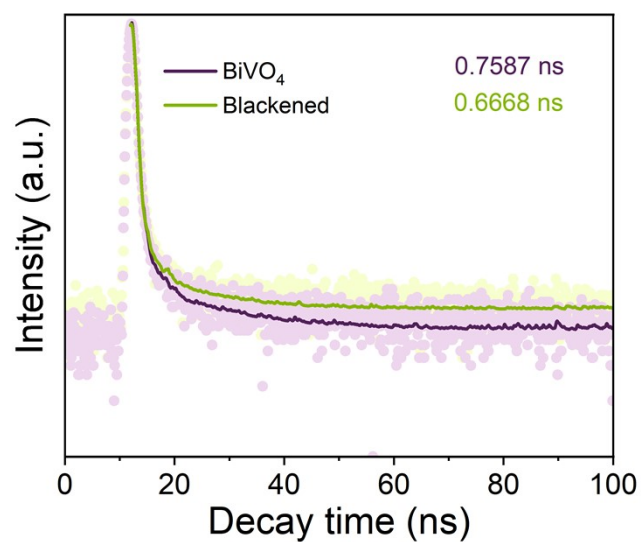

**Figure S4.** TRPL decay curves of BiVO<sub>4</sub> and Blackened.

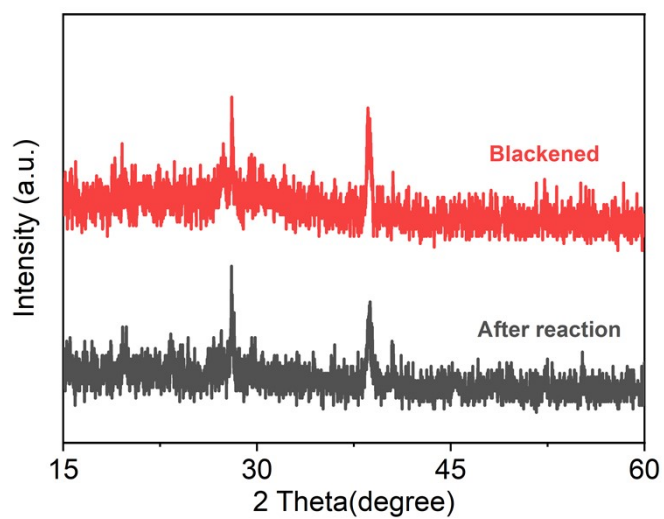

**Figure S5.** Post-reaction XRD characterization of the Blackened after the long-term stability test.

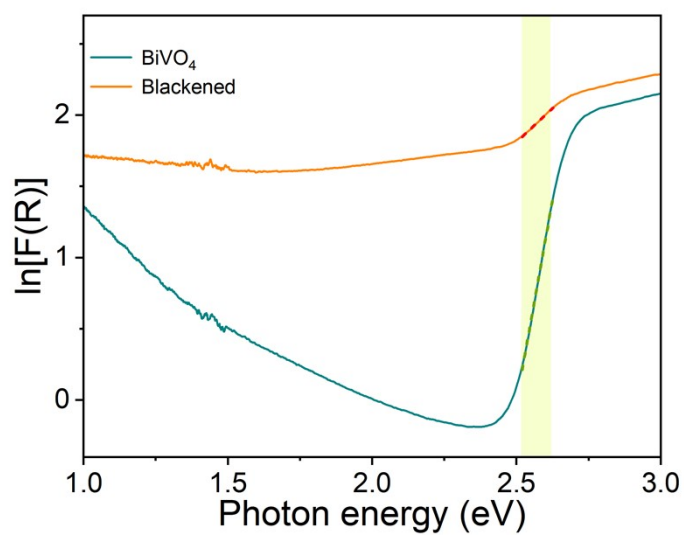

**Figure S6.** Linear fitting of  $\ln[F(R)]$  versus photon energy for estimating the Urbach energy of  $\text{BiVO}_4$  and Blackened.

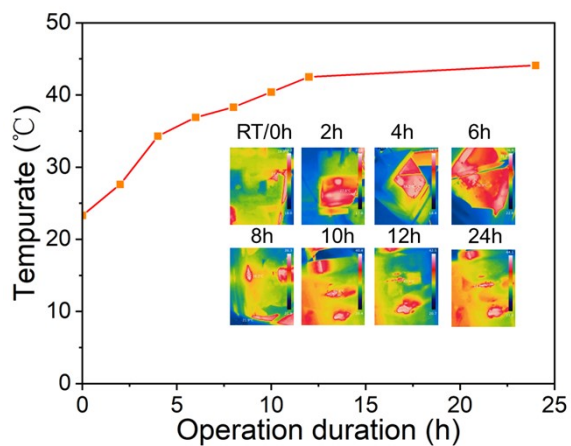

**Figure S7.** Temperature evolution of the blackened electrode under filtered illumination excluding wavelengths above 575 nm. A similar temperature increase is observed relative to the original irradiation condition.

## Supporting Tables

**Table S1.** Quantitative comparison of Bi and V before and after reconstruction based on XPS, EDS, and ICP analyses.

| Sample                 | Methods | Bi                          | V                           | Bi:V  |
|------------------------|---------|-----------------------------|-----------------------------|-------|
| BiVO <sub>4</sub>      | XPS     | 8.32(Atomic %)              | 6.23(Atomic %)              | 1.34  |
| Blackened              | XPS     | 8.07(Atomic %)              | 0.05(Atomic %)              | 161.4 |
| BiVO <sub>4</sub>      | EDS     | 7.36(Atomic %)              | 7.13(Atomic %)              | 1.03  |
| Blackened              | EDS     | 6.92(Atomic %)              | 0.06(Atomic %)              | 115   |
| BiVO <sub>4</sub>      | ICP     | $6.72 \times 10^{-4}$ (mol) | $7.39 \times 10^{-4}$ (mol) | 0.91  |
| Blackened              | ICP     | $5.60 \times 10^{-4}$ (mol) | $6.12 \times 10^{-5}$ (mol) | 9.15  |
| Post reaction solution | ICP     | $3.83 \times 10^{-5}$ (mol) | $4.51 \times 10^{-4}$ (mol) | 0.085 |

**Table S2.** Quantitative comparison of the fitted O 1s components for pristine BiVO<sub>4</sub> and Blackened.

| Sample            | Lattice O (%) | Vacancy-related O (%) | Adsorbed O / OH (%) |
|-------------------|---------------|-----------------------|---------------------|
| BiVO <sub>4</sub> | 61            | 27                    | 12                  |
| Blackened         | 34            | 43                    | 23                  |

**Table S3.** Urbach energy analysis of BiVO<sub>4</sub> and Blackened.

| Sample            | Fitting range (eV) | Slope of $\ln[F(R)]$ vs. (hv) | (E <sub>U</sub> ) (eV) | (R <sup>2</sup> ) |
|-------------------|--------------------|-------------------------------|------------------------|-------------------|
| BiVO <sub>4</sub> | 2.52–2.62          | 11.38                         | 0.088                  | 0.9988            |
| Blackened         | 2.52–2.62          | 1.90                          | 0.525                  | 0.9990            |
